# Supplementary material for: Structural characterization of metal complexes in aqueous solutions: a XAS study of stannous fluoride
Source: Royal Society of Chemistry journal article supplement (doi:10.1039/c8cp01461b), 2018-01-01
Supplement: c8cp01461b1.pdf [file c8cp01461b1.pdf]

**Supporting Information**

**Structural Characterization of Metal Complexes**

**in Aqueous Solutions:**

**A XAS study of stannous fluoride**

Marco A. Alsina and Jean-François Gaillard\*

*Department of Civil and Environmental Engineering, Northwestern University, Evanston,  
IL, 60208-3109*

E-mail: [jf-gaillard@northwestern.edu](mailto:jf-gaillard@northwestern.edu)

Phone: +1 847-467-1376

# Estimation of structural parameters of stannous fluoride complexes from EXAFS spectra

Lets start by writing the EXAFS spectrum of a given stannous fluoride solution,  $\chi_i(k)$ , following the formal description of the photoelectron scattering phenomena:<sup>?</sup>

$$\chi_i(k) = \frac{S_0 N_i f(k) e^{-2k\sigma_i^2} e^{-2R_i/\lambda(k)}}{k R_i^2} \sin[2kR_i + \delta(k)] \quad (1)$$

Where  $S_0$  corresponds to the amplitude reduction factor,  $N_i$  and  $R_i$  are the coordination number and bond distance of the coordination shell, respectively,  $f(k)$  and  $\delta(k)$  are scattering properties of the neighboring atoms,  $\lambda(k)$  is the inelastic free mean path of the photoelectron, and  $\sigma_i^2$  is the mean-square displacement in bond distance, also known as the Debye-Waller factor. Here we assume that the EXAFS spectrum can be approximated by single scattering of a single coordination shell, which is sufficient for simple coordination complexes. Note that the scattering properties and the inelastic free mean path are dependent on the photoelectron wavenumber  $k$  and the identity of the neighboring atoms.

We can also express  $\chi_i(k)$  as a linear combination of the EXAFS spectra of stannous complexes  $\hat{\chi}_j(k)$ :

$$\chi_i(k) = \sum_{j=1}^n \alpha_{jk} \hat{\chi}_j(k), \quad i \leq m \quad (2)$$

$$\sum_{j=1}^n \alpha_{ij} = 1 \quad (3)$$

Where  $\alpha_{ij}$  corresponds to the proportion of the  $j$ -th species for the measured solution  $i$ . Naturally the proportion of species for a given solution must add to one, since we consider completeness of our ensemble of species.

Replacing equation 1 in both sides of equation 2 and removing duplicated terms in both

sides yields the following:

$$\frac{N_i e^{-2k\sigma_i^2} e^{-2R_i/\lambda(k)}}{R_i^2} \sin[2kR_i + \delta(k)] = \sum_{j=1}^n \alpha_{ij} \frac{\hat{N}_j e^{-2k\sigma_j^2} e^{-2\hat{R}_j/\lambda(k)}}{\hat{R}_j^2} \sin[2k\hat{R}_j + \delta(k)] \quad (4)$$

The previous equation can be simplified by assuming similarity between the Debye-Waller factor of the measured solution and the stannous complexes, as well as similarity for the photoelectron mean free path:

$$e^{-2k\sigma_i^2} \approx e^{2k\sigma_j^2} \quad ; \quad e^{R_i/\lambda(k)} \approx e^{\hat{R}_j/\lambda(k)} \quad (5)$$

$$\frac{N_i}{R_i^2} \sin[2kR_i + \delta(k)] = \sum_{j=1}^n \alpha_{ij} \frac{\hat{N}_j}{\hat{R}_j^2} \sin[2k\hat{R}_j + \delta(k)] \quad (6)$$

A small angle approximation can be performed for the sinusoidal part of the equation by arbitrarily selecting a wavenumber ( $k_0$ ) that enforces a null value. We can therefore perturb the equation around  $k_0$  and perform the approximation via Taylor expansion:

$$\sin[2k_0 R_i + \delta(k_0)] = 0 \quad (7)$$

$$\sin[2(k_0 + \Delta k)R_i + \delta(k_0 + \Delta k)] \approx \sin[2\Delta k R_i] \quad (8)$$

$$\approx 2\Delta k R_i - \frac{(2\Delta k R_i)^3}{3!} \quad (9)$$

Rewriting equation 6 in terms of the small angle approximation and separating the expanded terms yields the following equations:

$$N_i = \sum_{j=1}^n \alpha_{ij} \hat{N}_j \frac{R_i}{\hat{R}_j} \quad (10)$$

$$R_i = \frac{\sum_{j=1}^n \alpha_{ij} \hat{N}_j \hat{R}_j}{N_i} \quad (11)$$

Finally, assuming similarity between the estimated bond distance of the measured solution and the bond distance of the stannous complexes yields the following expressions for  $N_i$  and  $R_i$ :

$$R_i \approx \hat{R}_j \quad (12)$$

$$N_i = \sum_{j=1}^n \alpha_{ij} \hat{N}_j \quad (13)$$

$$R_i = \frac{\sum_{j=1}^n \alpha_{ij} \hat{N}_j \hat{R}_j}{\sum_{j=1}^n \alpha_{ij} \hat{N}_j} \quad (14)$$

## Example of input file for PHREEQC calculations

```
1 DATABASE ../.. / phreeqc.dat
2 INCLUDE$ ../.. / sn_database
3 TITLE Speciation of solution with 0.2 m SnF2 + NaF
4
5 SOLUTION 1
6   units      mol/kgw
7   pH          7.00  charge
8   temp        25.0
9   -water      1.00    # kg
10  Sn           0.20
11  Na           <x>
12  F            <y>
13
14 EQUILIBRIUM_PHASES
15  SnO(s)       0.0     0.0
16  Sn(OH)2(s)   0.0     0.0
17
18 SELECTED_OUTPUT
19   -file snf2-naf.sel
20   -reset false
21   -pH true
22   -molalities SnF3- SnF2 SnF+ Sn+2
23   -totals Sn
24 END
```

# Graphical results for speciation of stannous fluoride solutions

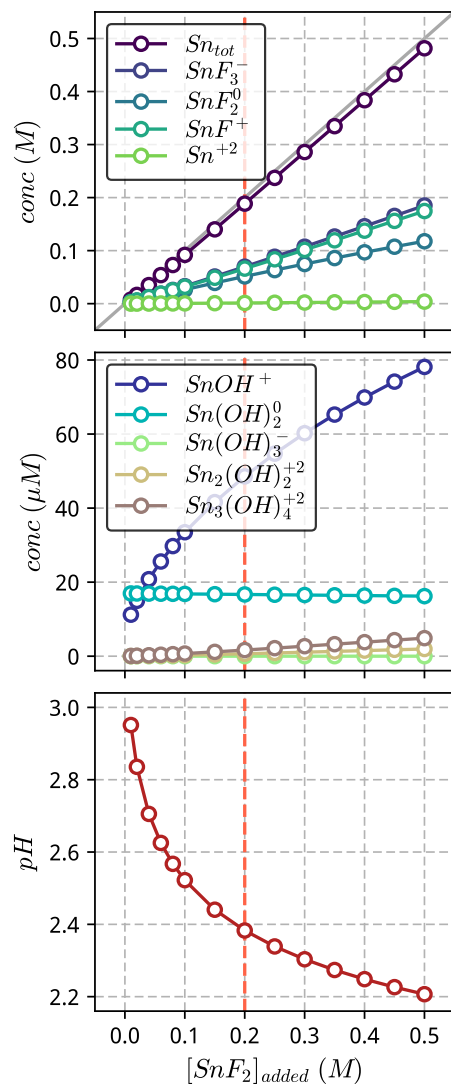

Figure S1: Distribution of stannous fluoride complexes (top), hydrolytic species (middle) and solution pH (bottom) as a function of the added amount of  $\text{SnF}_2$  in solution. The solid gray line (top) indicates the 1:1 ratio between the added concentration of  $\text{SnF}_2$  and the observed concentration in solution. The segmented red line indicates the concentration used for XAS measurements.

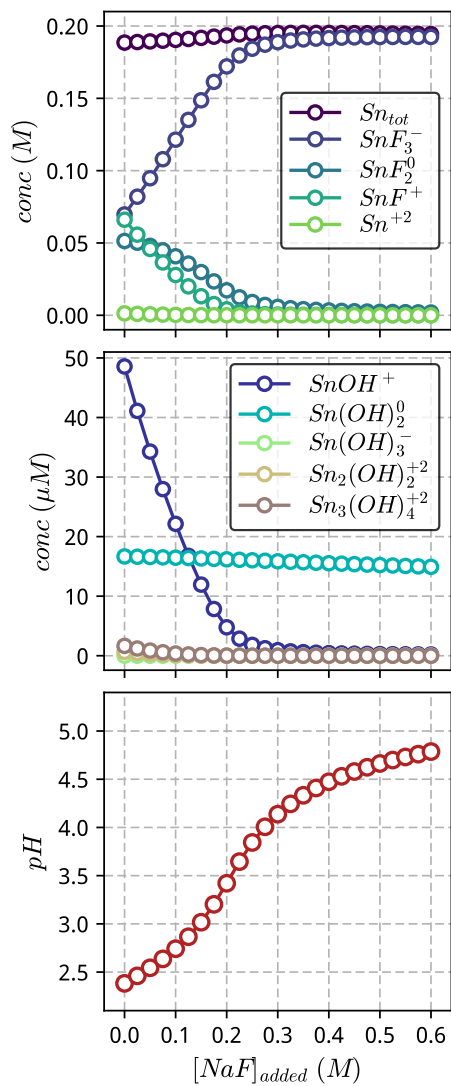

Figure S2: Distribution of stannous fluoride complexes (top), hydrolytic species (middle) and solution pH (bottom) as a function of the added amount of NaF in a solution  $SnF_2$  0.2 M. Note that the distribution of species shifts towards predominance of  $SnF_3^-$  for concentrations of NaF exceeding 0.3 M.

# Examples of input files for ORCA calculations

## Example file for geometry optimization

```
1 ! RI-MP2 ZORA/RI ma-ZORA-def2-TZVPP SARC/J
2 ! TightSCF TightOpt Grid5 FinalGrid6
3 ! CPCM
4 %basis
5   newgto Sn "old-ZORA-TZVPP" end
6 end
7 %method
8   SpecialGridAtoms 50
9   SpecialGridIntAcc 7
10 end
11 %cpcm
12   smd true
13   solvent "WATER"
14   sola 1.17
15   solb 0.18
16 end
17 %geom MaxIter 500 end
18 %pal nprocs 12 end
19
20 # Geometry optimization for the SnF3- complex
21 * xyzfile -1 1 init.xyz
```



## Example file for vibrational analysis

```
1 ! RI-MP2 ZORA/RI ma-ZORA-def2-TZVPP SARC/J
2 ! TightSCF TightOpt NumFreq Grid5 FinalGrid6
3 ! CPCM MORread
4 %basis
5   newgto Sn "old-ZORA-TZVPP" end
6 end
7 %method
8   SpecialGridAtoms 50
9   SpecialGridIntAcc 7
10 end
11 %cpcm
12   smd true
13   solvent "WATER"
14   sola 1.17
15   solb 0.18
16 end
17 %moinp "init.gbwn"
18 %freq
19   Increment 0.001
20 end
21 %pal nprocs 12 end
22
23 # Vibrational analysis of the SnF3- complex
24 * xyzfile -1 1 init.xyz
```

## Example file for orbital localization

```
1 ! RI-MP2 ZORA/RI ma-ZORA-def2-TZVPP SARC/J
2 ! TightSCF Grid5 FinalGrid6
3 ! CPCM MORead
4 %basis
5   newgto Sn "old-ZORA-TZVPP" end
6 end
7 %method
8   SpecialGridAtoms 50
9   SpecialGridIntAcc 7
10 end
11 %cpcm
12   smd true
13   solvent "WATER"
14   sola 1.17
15   solb 0.18
16 end
17 %moinp "init.gbz"
18 %loc
19   LocMet IAOIBO
20 end
21 %pal nprocs 12 end
22
23 # Localization of orbitals for the SnF3- complex
24 * xyzfile -1 1 init.xyz
```
